# Supplementary material for: Targeting the HERV-K102 Envelope Elicits Pyroptosis and Represents a Novel Therapeutic Strategy for Acute Myeloid Leukemia
Source: Research Square preprint supplement (doi:10.21203/rs.3.rs-7976215/v1), 2025-11-24

**supplementary file**

1. Clinical trial number: not applicable
2. Original data

**Figure 1 (B) HERV-K102**


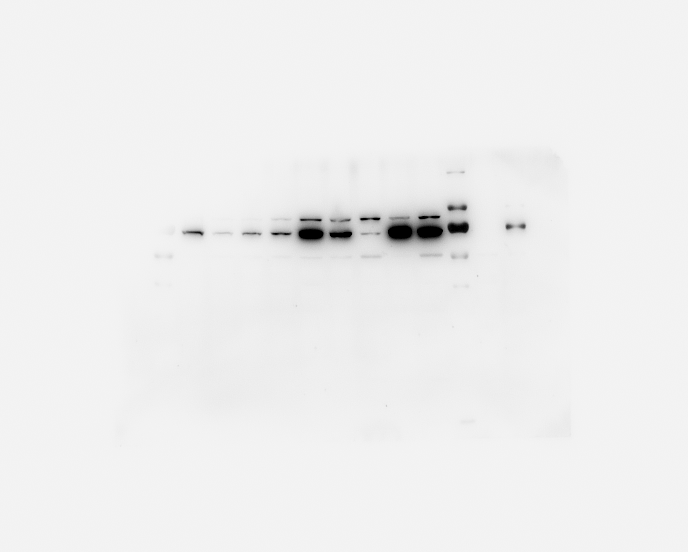


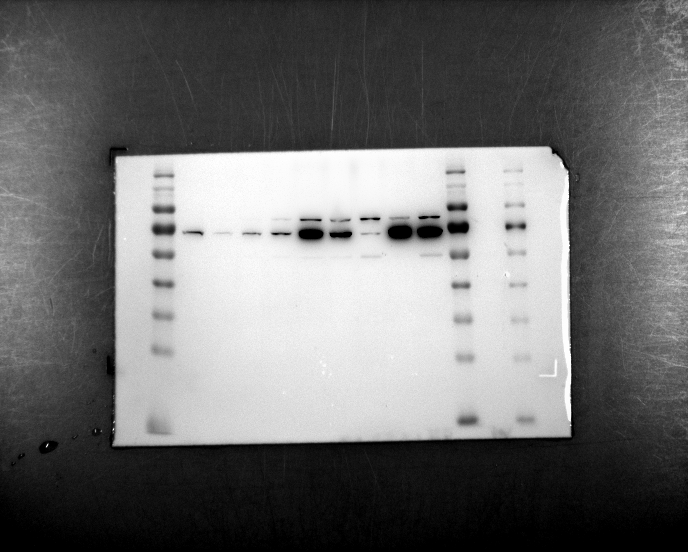


**GAPDH**


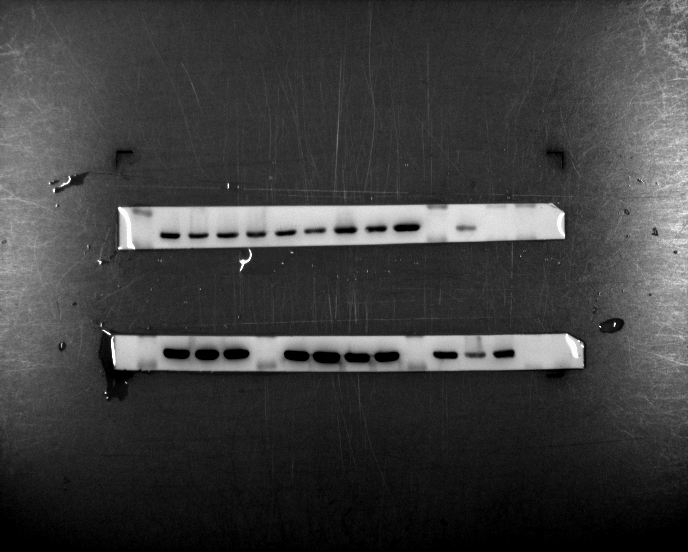


Figure 5

**MV4-11 (****Figure 5D)**


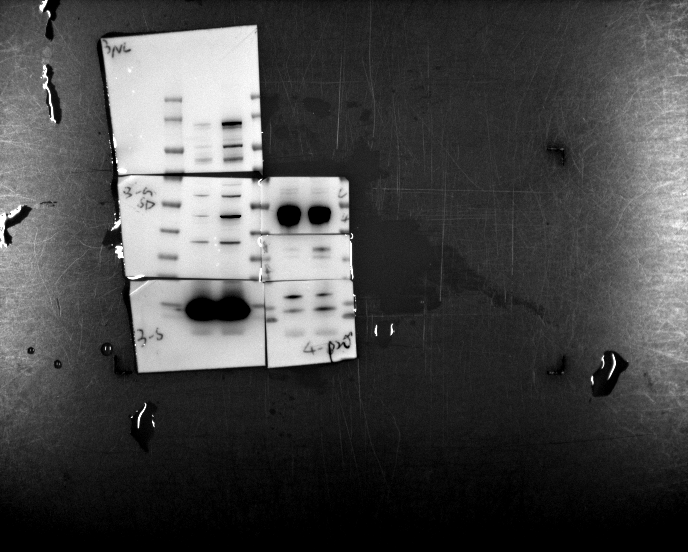


GSDMD (53KD)

GSDMD-N (35KD)

IL-1β

CASPASE 1

NLRP3

CASPASE1-P20

S100A9

**THP-1 (Figure 5F)**


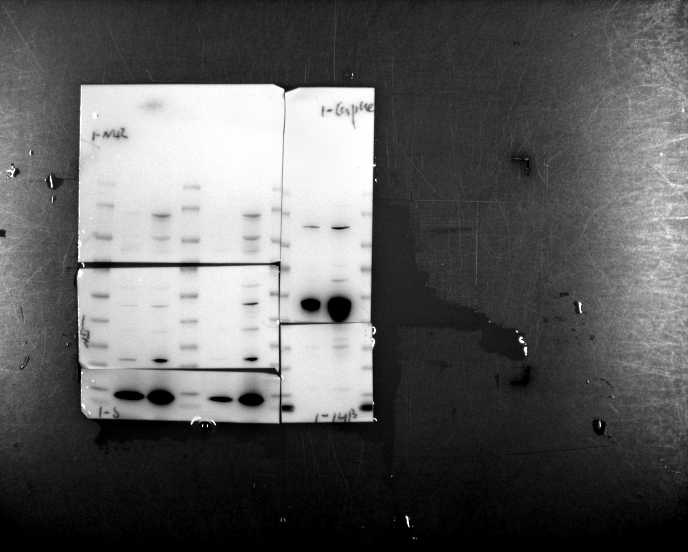


CASPASE-1

NLRP3

S100A9

IL-1β

GSDMD (53KD)

GSDMD-N (35KD)

THP-1


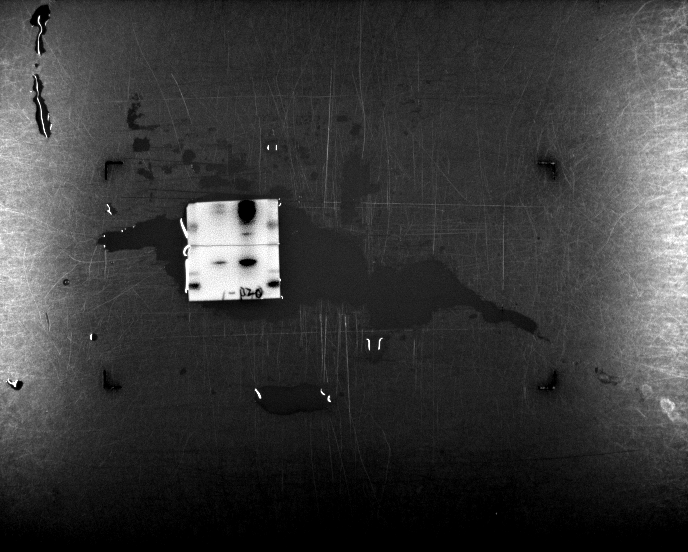


CASPASE 1-P20

IL-1β

**GAPDH** MV4-11, MV4-11 KO, THP-1, THP-1 KO


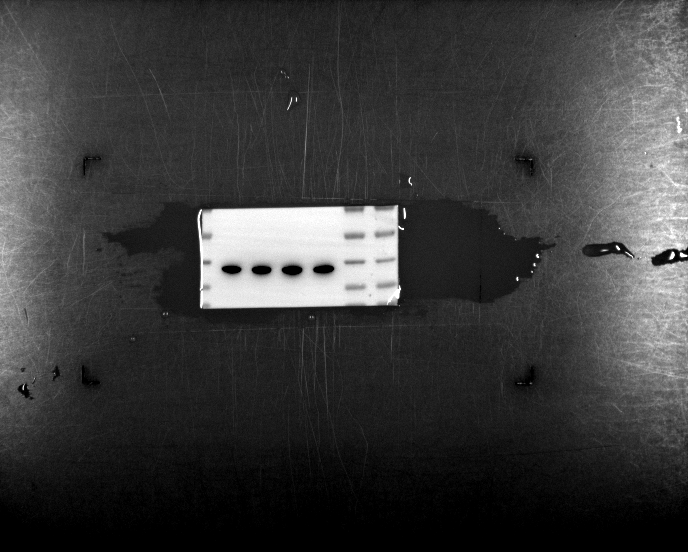

Supplement: Supplementary file 1 [file ce51ba086001475be98c9885.docx]
